# Supplementary material for: A high-performance catalyst support for methanol oxidation with graphene and vanadium carbonitride
Source: Royal Society of Chemistry journal article supplement (doi:10.1039/c4nr05244g), 2014-12-03
Supplement: c4nr05244g1.pdf [file c4nr05244g1.pdf]

Electronic Supplementary Information

**A high-performance catalyst support for methanol oxidation with graphene and  
vanadium carbonitride**

Taizhong Huang,<sup>\*†a,b</sup> Shun Mao,<sup>‡b</sup> Guihua Zhou,<sup>b</sup> Zhaoliang Zhang,<sup>a</sup> Zhenhai Wen,<sup>b</sup> Xingkang  
Huang,<sup>b</sup> Suqin Ci<sup>b</sup> and Junhong Chen<sup>\*b</sup>

<sup>a</sup>Key Laboratory of Chemical Sensing & Analysis in Universities of Shandong, School of Chemistry and  
Chemical Engineering, University of Jinan, Jinan 250022, China. E-mail: chm\_huangtz@ujn.edu.cn; Fax:  
+86 531 82765969; Tel: +86 531 89716103

<sup>b</sup>Department of Mechanical Engineering, University of Wisconsin-Milwaukee, 3200 North Cramer Street,  
Milwaukee, WI 53211, USA. E-mail: jhchen@uwm.edu; Fax: +1 414 2296958; Tel: +1 414 2292615

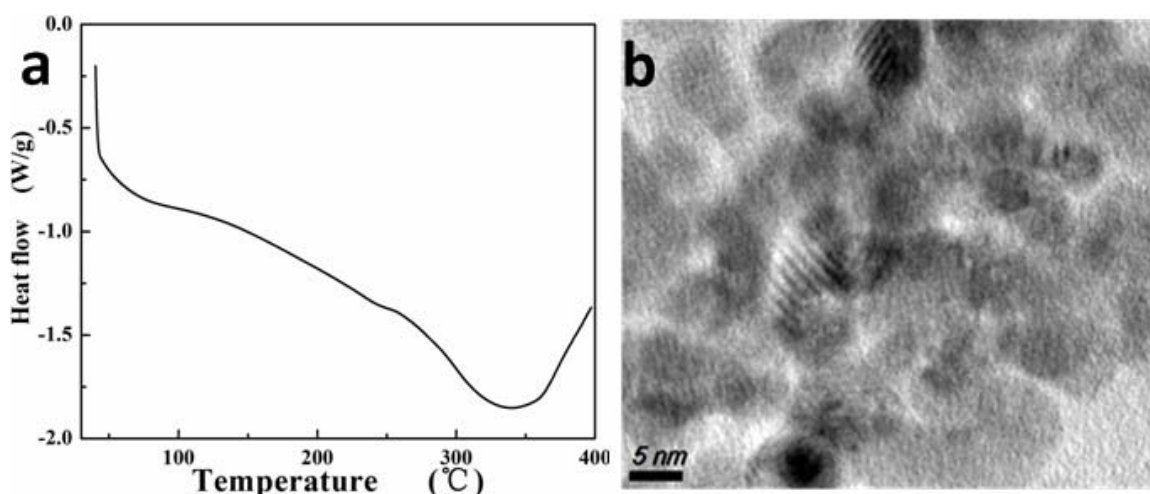

**Figure S1.** (a) DSC result of Pt/G-V(C, N) at a heating rate of 5°C/min. The DSC result of Pt/G-V(C, N) clearly shows that the curve decrease with the increase of temperature, which is aroused by the endothermic changes of materials. To this curve, the endothermic process should be attributed the structure changes of Pt loaded on G-V(C, N). The crystalline structure of Pt was improved during the heating. The curve reaches the lowest point at around 350 °C, which indicates that the structure change reaches the fastest speed. Considering the heating speed and the temperature for the lowest point, the annealing temperature for Pt/G-V(C, N) was determined at 400 °C. (b) TEM image of Pt/G-V(C, N) catalyst.

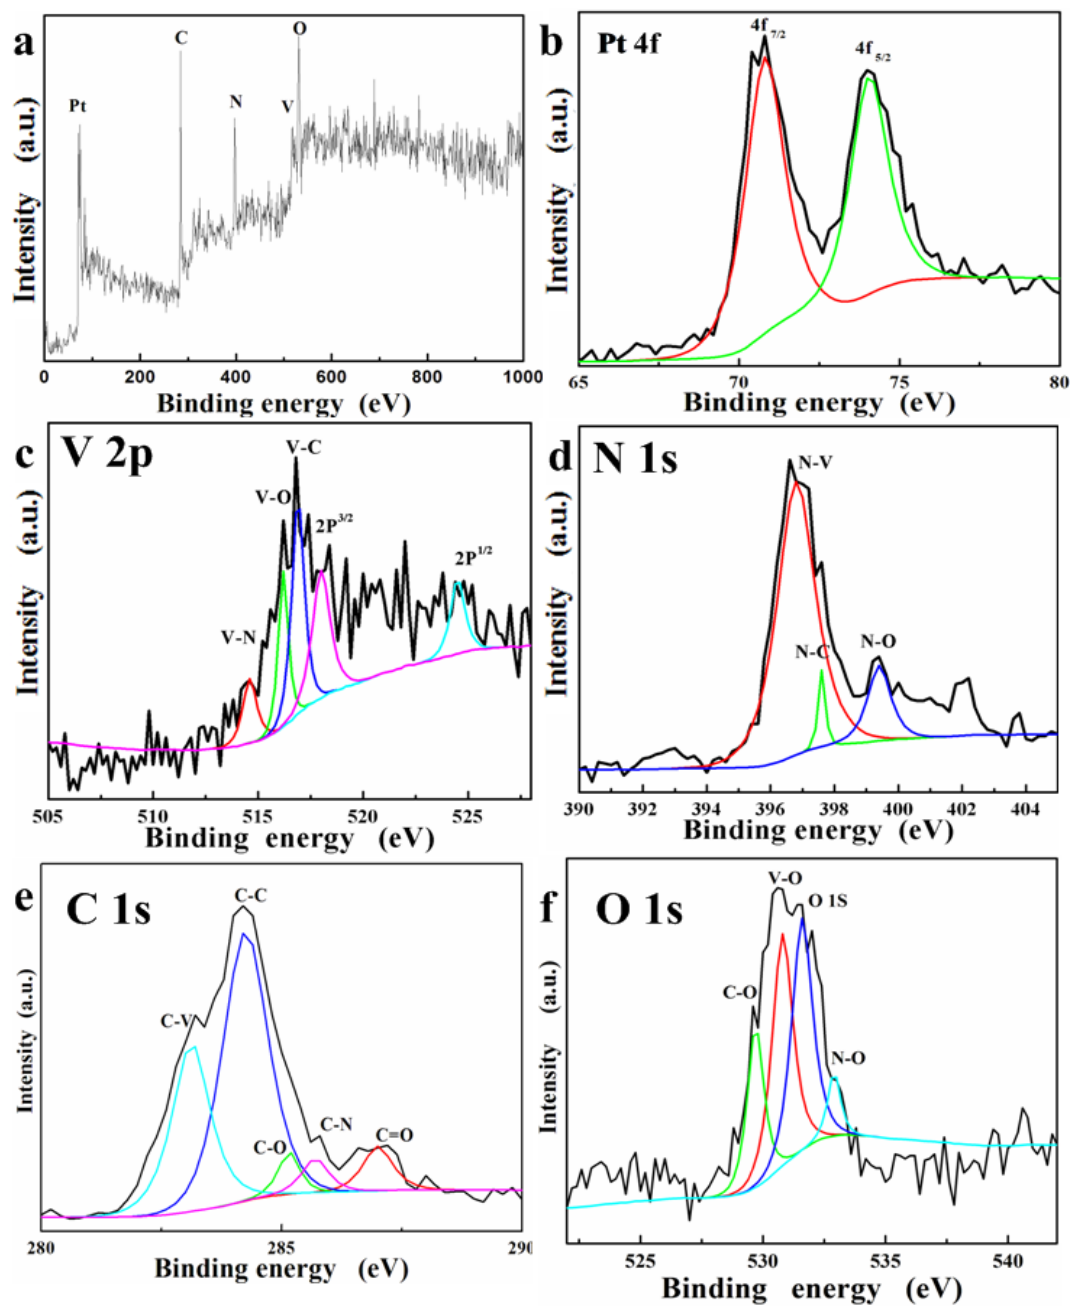

**Figure S2.** (a) XPS spectrum of Pt/G-V(C, N); (b), (c), (d), (e), and (f) are high-resolution XPS spectra of Pt4f, V2p, N1s, C1s, and O1s, respectively.

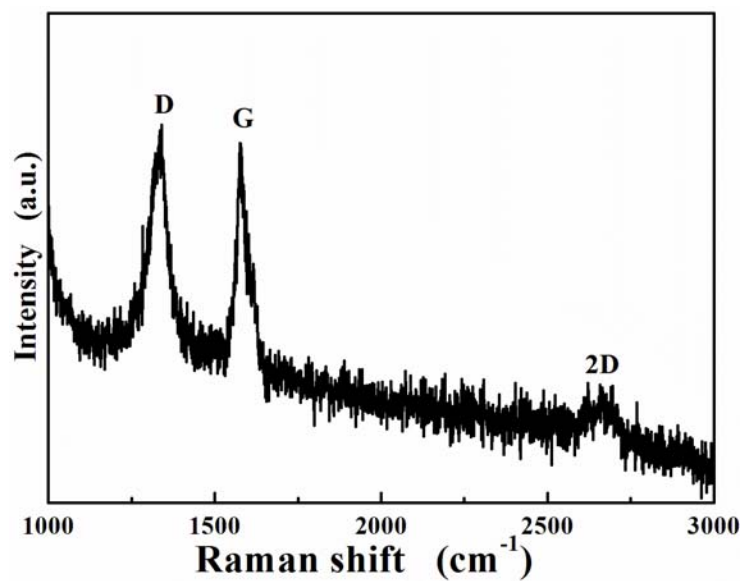

**Figure S3.** Raman spectrum of Pt/G-V(C,N).

5

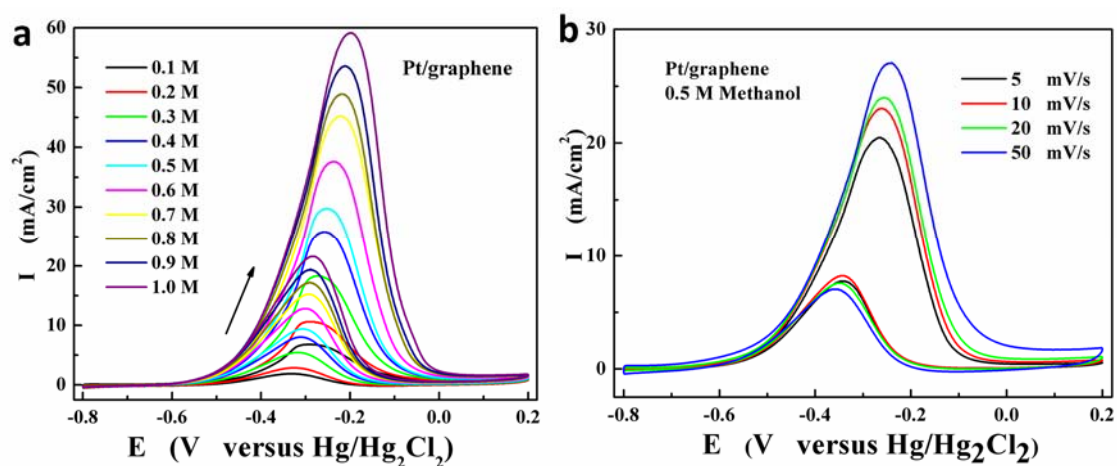

**Figure S4.** (a) CV curves of methanol oxidation at a scan rate of 50 mV/s with Pt/graphene in 1.0 M KOH solution with different methanol concentrations; (b) CV curves of methanol oxidation with Pt/graphene at different scan rates in 1.0 M KOH and 0.5 M methanol.

10

---

### Electrochemical surface area calculation:

The methanol oxidation performance of the catalyst was also evaluated by measuring the electrochemical surface area (ECSA). The ECSA is an important factor in electrochemical measurements, which is often calculated using hydrogen adsorption/desorption isotherms and the following equation:<sup>1</sup>

$$ECSA = \frac{Q_H}{q_H},$$

where  $Q_H$  is the average charge integrated from the hydrogen desorption region in a cyclic voltammogram and  $q_H$  is the charge of a monolayer of hydrogen on Pt surface ( $210 \mu\text{C cm}^{-2}$ ).<sup>2</sup> Using the CV curve in Figure 3a to calculate the  $Q_H$  (between  $-0.7 \text{ V}$  and  $-0.3 \text{ V}$  versus  $\text{Hg}/\text{Hg}_2\text{Cl}_2$ ), the ECSA was obtained as  $2.93 \text{ cm}^2$ . Considering the loading of Pt in the catalyst layer ( $0.005 \text{ mg}$ ), the effective surface area (ESA) could be  
10 calculated as  $58.7 \text{ m}^2 \text{ g}^{-1}$ .

### References:

- 1 J.-M. Yang, S.-A. Wang, C.-L. Sun and M.-D. Ger, *J. Power Sources*, 2014, **254**, 298-305.
- 2 W. Sheng, M. Myint, J. G. Chen and Y. Yan, *Energy Environ. Sci.*, 2013, **6**, 1509-1512.
